# Supplementary material
Source: PubMed Central journal article supplement (PMC8644829)
Supplement: kiab099_supplementary_data.pdf [file kiab099_supplementary_data.pdf]

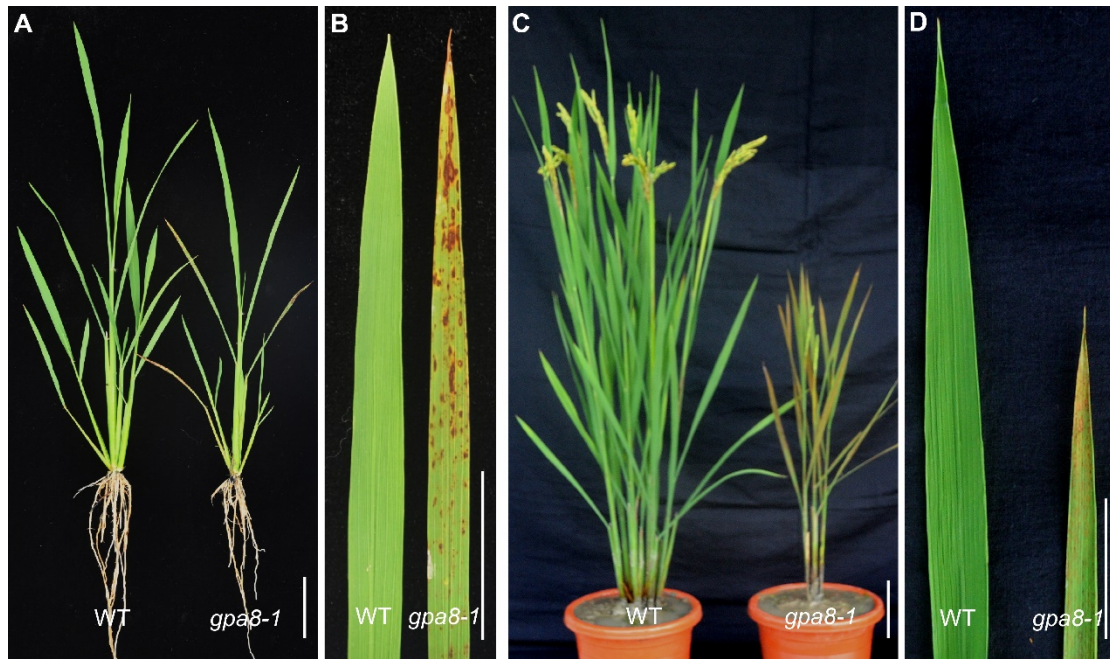

**Supplemental Figure S1.** Phenotypic characterization of wild type and *gpa8-1*.

(A) and (B) Plant phenotypes at seedling stage. Bars = 5 cm in (A) and 2 cm in (B). (C) and (D) Plant phenotypes at maturation stage. Bars = 10 cm in (C) and 4 cm in (D).

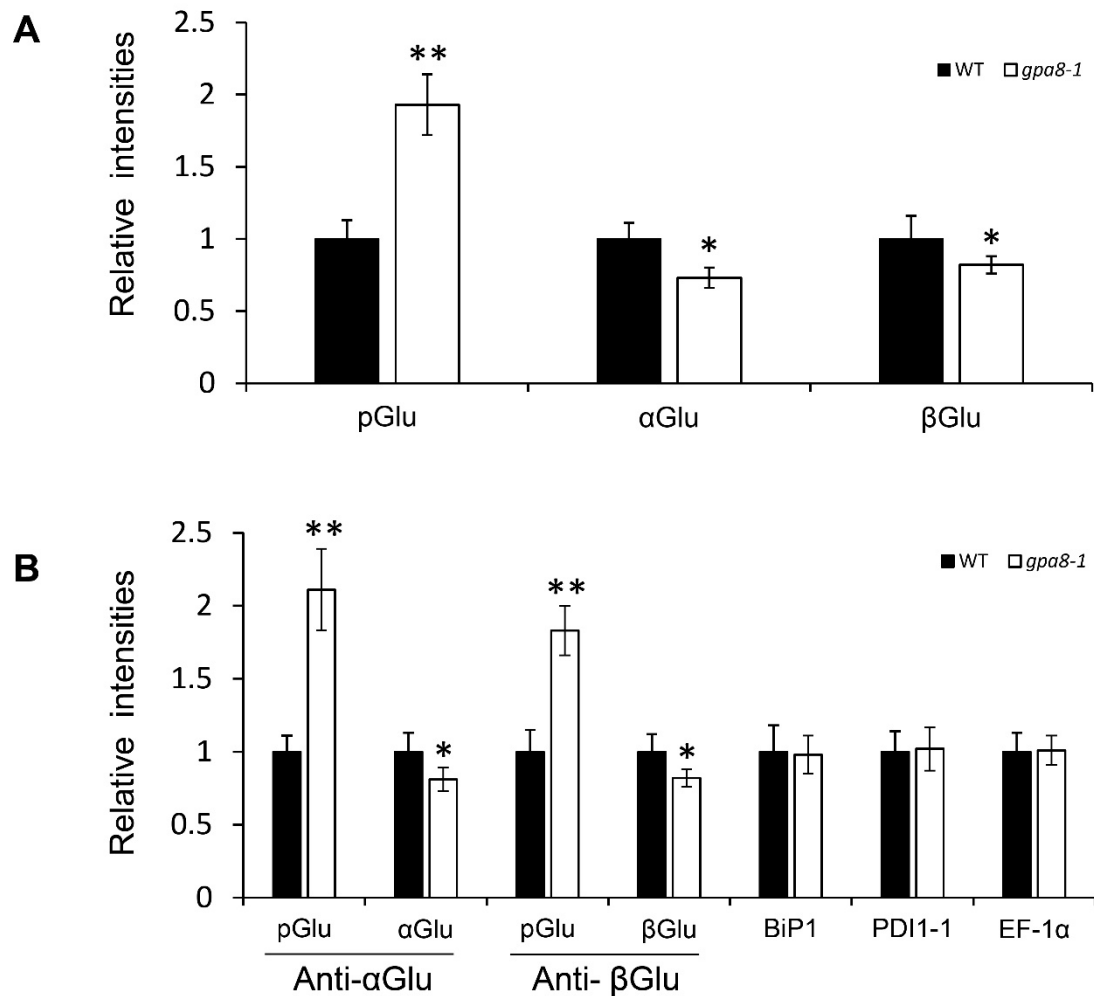

**Supplemental Figure S2.** Relative intensities of protein bands in SDS-PAGE and immunoblotting assays.

(A) Relative intensities of the protein bands of SDS-PAGE analysis in Fig. 1d.

(B) Relative intensities of the immunostained bands in Fig. 1e. Using 1 as the intensity value for the WT. Three independent experiments were performed.

Values are means  $\pm$  SD. pGlu, 57 kD proglutelins; αGlu, 40 kD glutelin acidic subunits; βGlu, 20 kD glutelin basic subunits. \*\* $P < 0.01$ , \* $P < 0.05$  ( $n = 3$ , Student's  $t$  test).

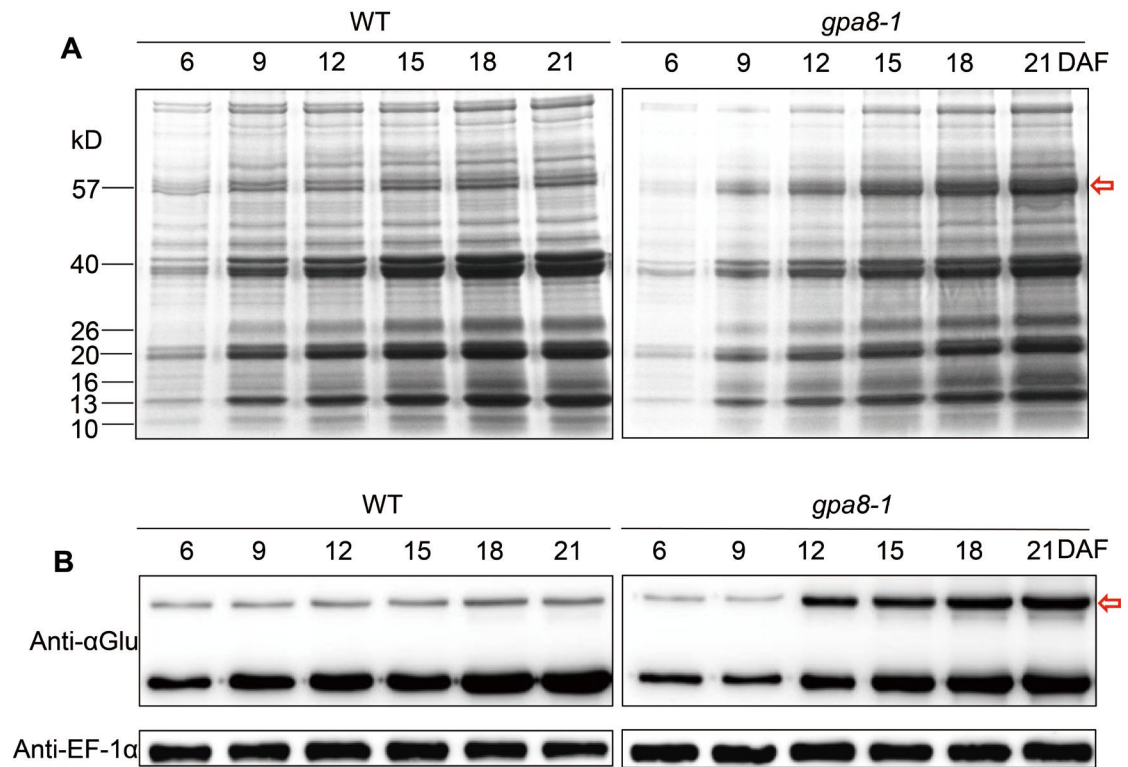

**Supplemental Figure S3.** Time-course analysis of storage protein accumulation during endosperm development of wild type Ninggeng 1 and the *gpa8-1* mutant.

(A) SDS-PAGE analyses of seed storage proteins during wild-type and *gpa8-1* endosperm development. DAF, days after flowering. (B) Immunoblot analysis of glutelins during wild-type and *gpa8-1* endosperm development. Red arrow indicates the 57-kD proglutelins.

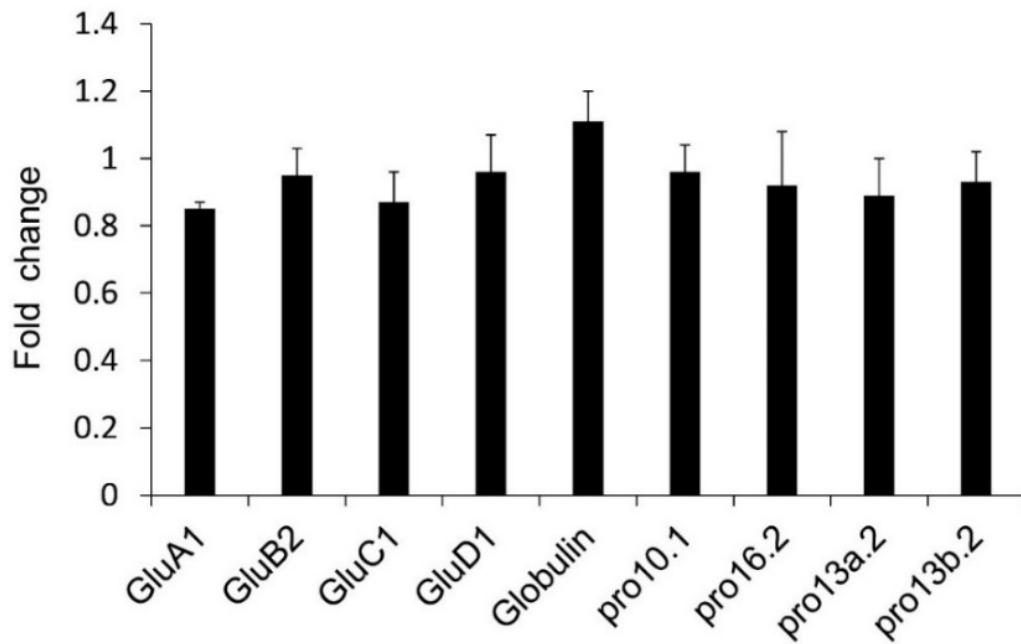

**Supplemental Figure S4.** RT-qPCR assay of the expression of representative genes coding for storage proteins in 12 DAF endosperm. Glutelin genes: *GluA1* (*LOC\_Os01g55690*), *GluB2* (*LOC\_Os02g15150*), *GluC1* (*LOC\_Os02g25640*), *GluD1* (*LOC\_Os02g15090*); prolamin genes: *pro10.1* (*LOC\_Os05g41970*), *pro16.2* (*LOC\_Os06g31070*), *pro13a.2* (*LOC\_Os07g10580*), *pro13b.2* (*LOC\_Os07g11910*). Using 1 as the gene expression value for the WT. Values are means  $\pm$  SD (n = 3).

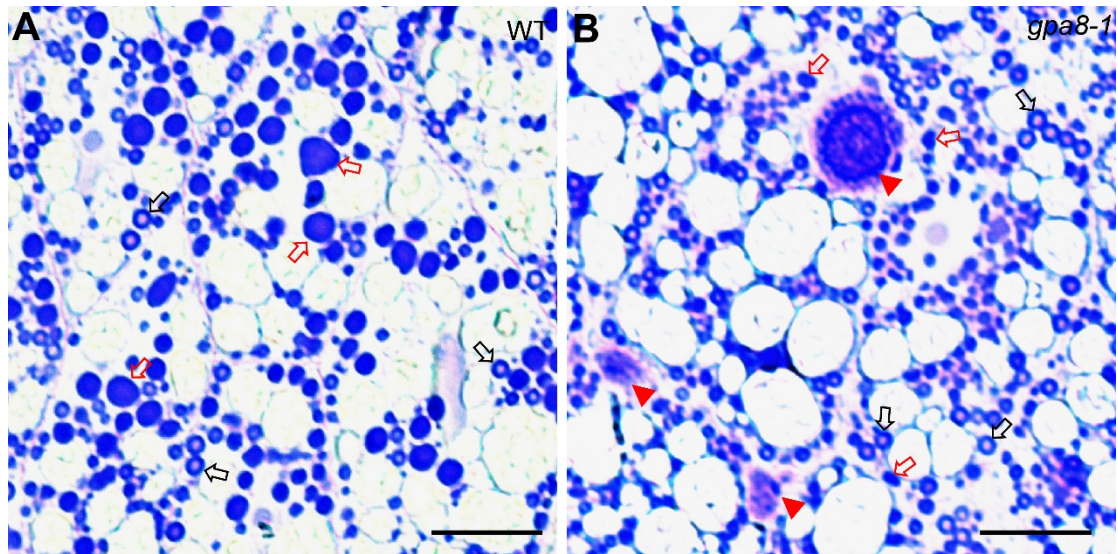

**Supplemental Figure S5.** Light microscopy of protein bodies in subaleurone cells of wild type and the *gpa8-1* mutant.

(A) and (B) Endosperm sections at 12 DAF in wild type (A) and the *gpa8-1* mutant (B) stained with Coomassie blue. Black and red arrows indicate PBIs and PBs, respectively. Red arrowheads denote the PMB structures in the *gpa8-1* mutant. Bars = 10  $\mu$ m.

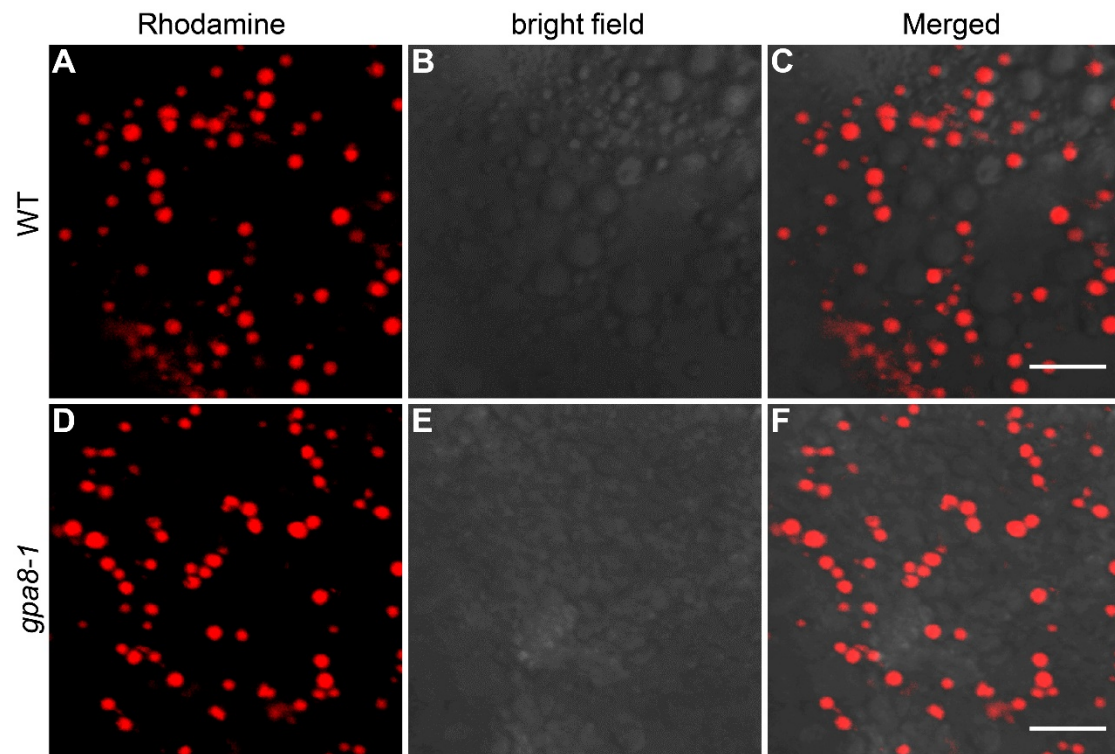

**Supplemental Figure S6.** Size of PBI in wild type and the *gpa8-1* mutant.

(A) to (F) Confocal microscopy images of Rhodamine-labeled PBIs in WT (A-C) and *gpa8-1* (D-F) sub-aleurone cells. Bars = 10  $\mu$ m.

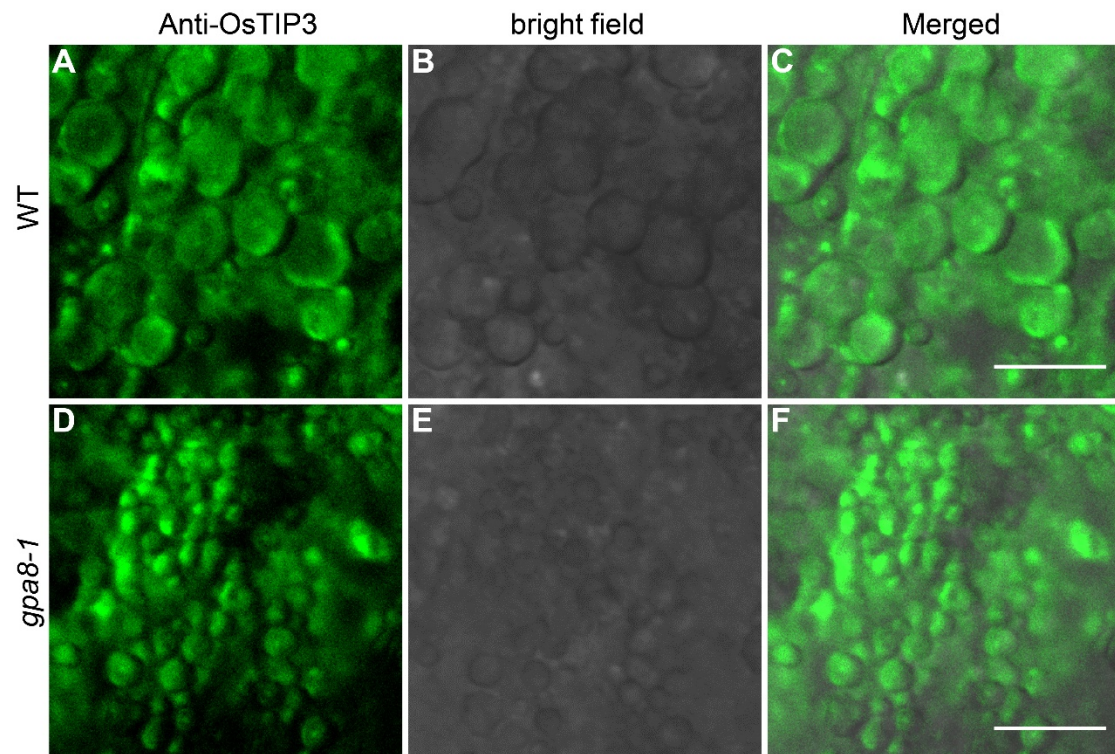

**Supplemental Figure S7.** Size of PSV/PBI in wild type and the *gpa8-1* mutant.

(A) to (F) Confocal microscopy images of TIP3-marked PSVs/PBIs in WT (A-C) and *gpa8-1* (D-F) sub-aleurone cells. Bars = 10  $\mu$ m.

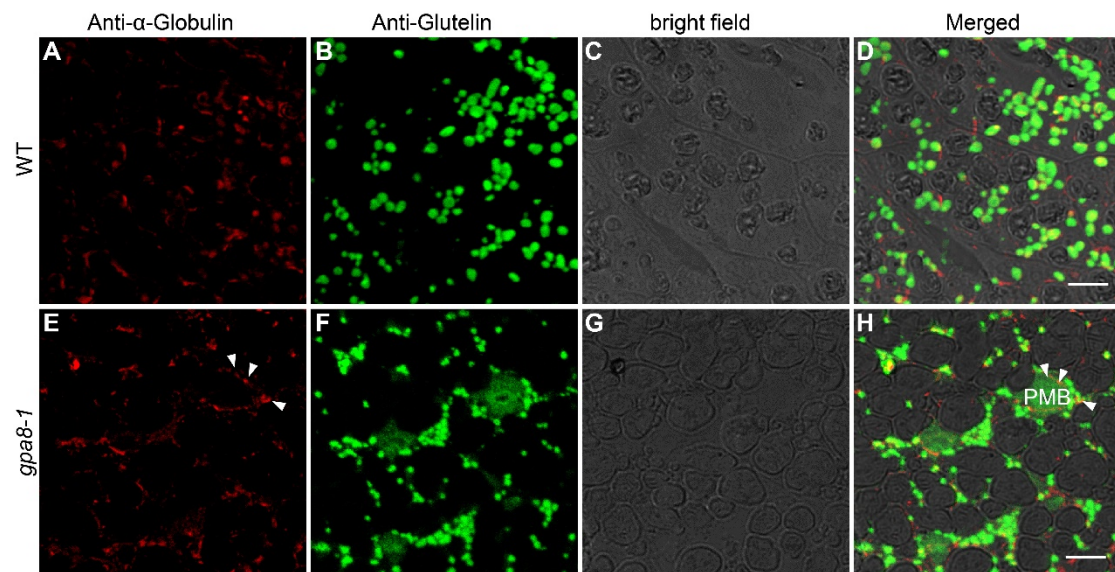

**Supplemental Figure S8.** Immunofluorescence microscopy of protein bodies in the sub-aleurone cells of wild type and the *gpa8-1* mutant.

(A) to (H) Immunofluorescence microscopy images of storage proteins in wild-type (A-D) and *gpa8-1* (E-F) 12 DAF seeds. (A, E) Secondary antibodies conjugated with Alexa fluor 555 (red) were used to trace the antigens recognized by anti- $\alpha$ -globulin antibodies. (B, F) Secondary antibodies conjugated with Alexa fluor 488 (green) were used to trace the antigens recognized by the anti-glutelin antibodies. (D, H) Merged images. White arrowheads in (H) indicate the mis-sorted  $\alpha$ -globulin in the PMB. Bars = 10  $\mu$ m (A-H).



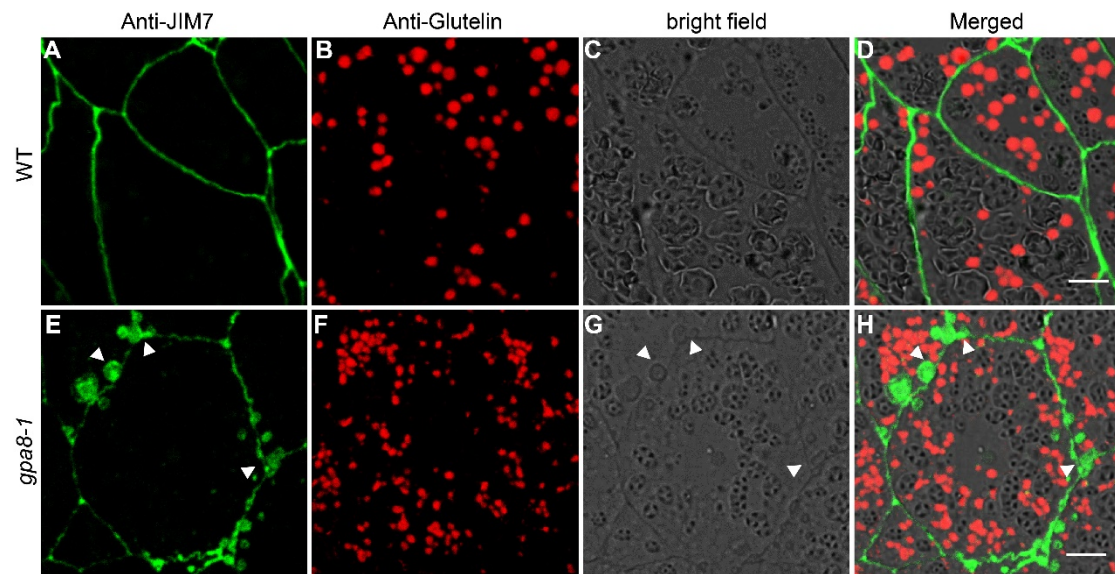

**Supplemental Figure S9.** Distribution of cell wall materials in 12 DAF endosperm cells.

(A) to (H) 12 DAF sections of wild type (A-D) and the *gpa8-1* mutant (E-H) were incubated with anti-pectin (JIM7) or glutelin antibodies, followed by secondary antibodies conjugated to Alexa-555 or Alexa-488. White arrowheads in (E, G, H) indicate the mis-sorted pectin in the PMB. Bars = 10  $\mu$ m (A-H).

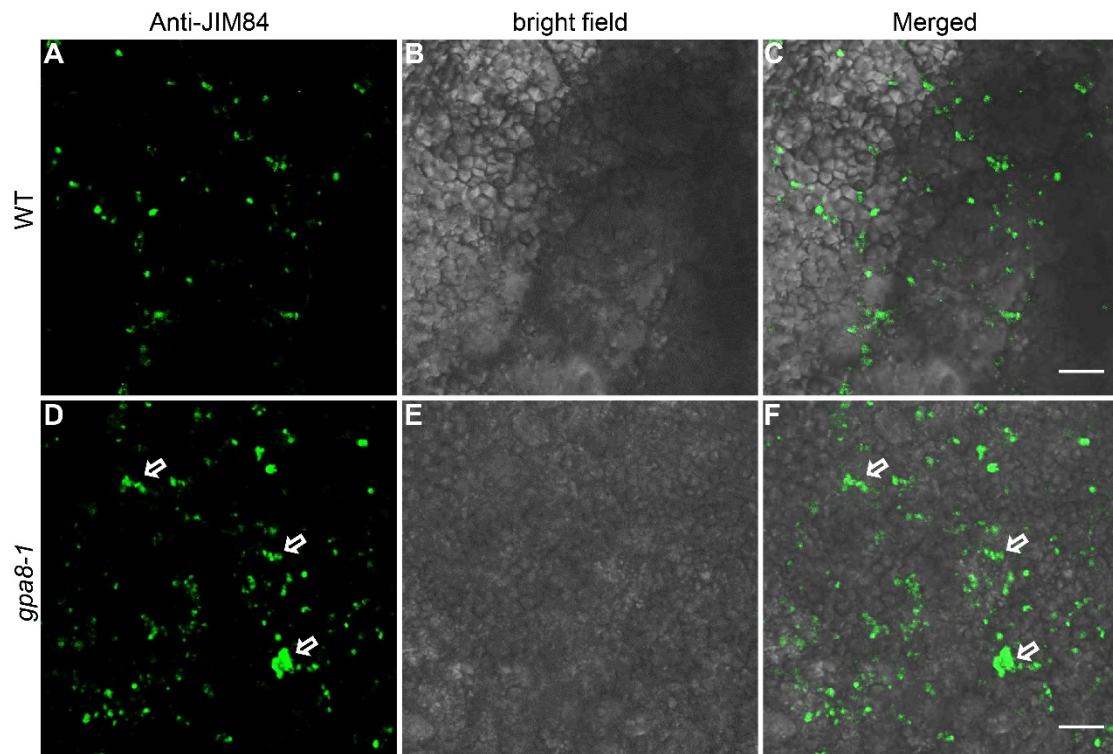

**Supplemental Figure S10.** Distribution of Golgi stacks in 12 DAF endosperm cells.

(A) to (F) Sections of 12 DAF endosperms from wild type (A-C) and the *gpa8-1* mutant (D-F) were incubated with JIM84 antibody, followed by secondary antibodies conjugated to Alexa-555. Golgi stacks were marked by JIM84 antibody. Arrowheads indicate clusters of Golgi stacks. Bars = 10  $\mu$ m.

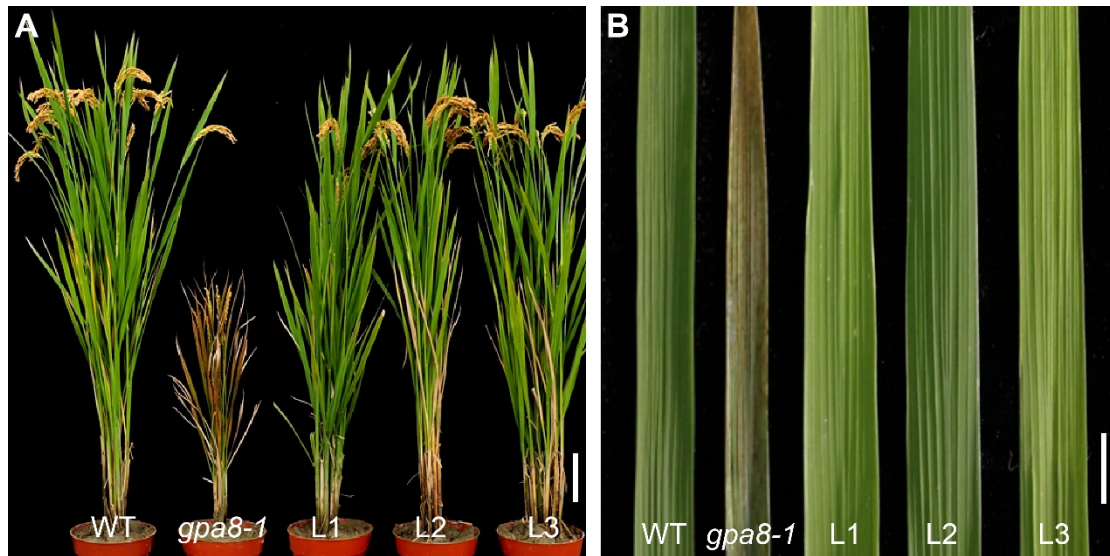

**Supplemental Figure S11.** Genetic complementation.

(A) and (B) *LOC\_Os01g46980* coding sequence under the control of maize *ubiquitin* promoter rescues lesion-mimics and early senescence phenotypes of *gpa8-1*. Bars =10 cm in (A) and 1 cm in (B).

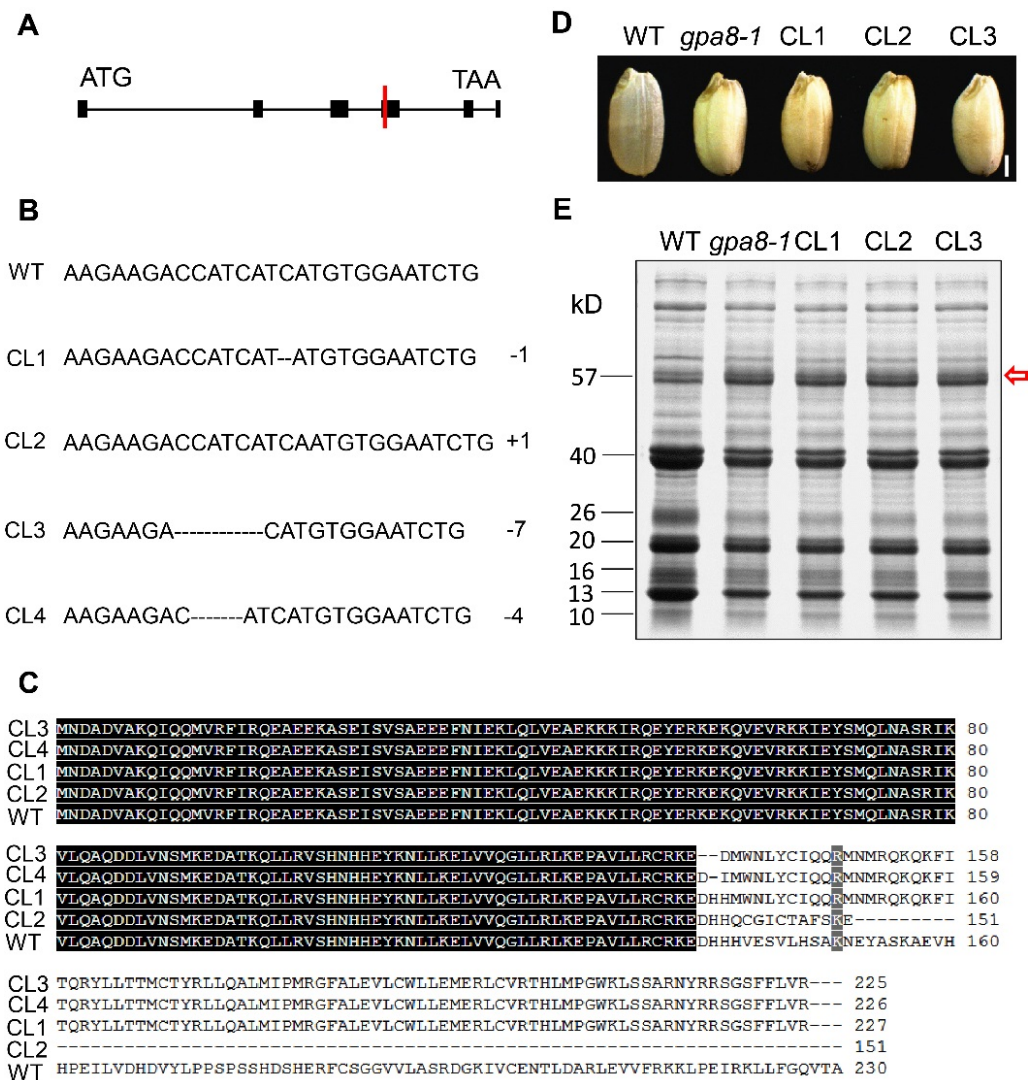

**Supplemental Figure S12. CRISPR/Cas9 lines of *OsVHA-E1*.**

(A) Schematic diagram of the CRISPR target site on *OsVHA-E1*. (B) Mutations at the target site in four representative lines generated by CRISPR/Cas9. (C) The predicted truncated proteins encoded by the CRISPR alleles. (D) Grain appearance of WT and three CRISPR/Cas9 lines (CL1-CL3). Bar = 1 mm. (E) SDS-PAGE profiles of total seed storage proteins of the wild type and CRISPR/Cas9 lines. Red arrow indicates the 57 kD proglutelins.

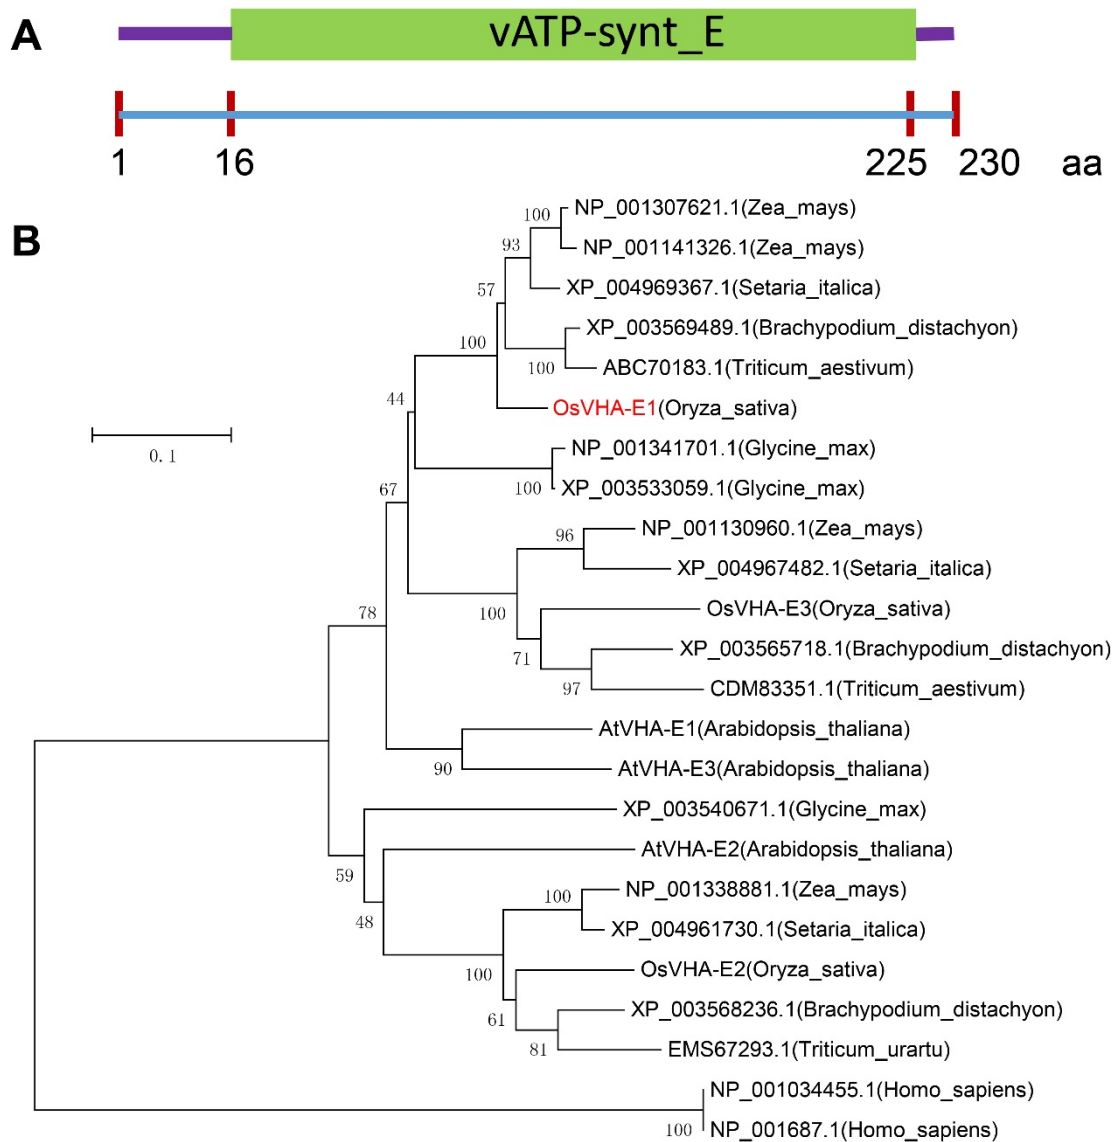

**Supplemental Figure S13.** Sequence and phylogenetic analyses of OsVHA-E1.

(A) OsVHA-E1 contains a vATP-synt\_E domain predicted by SMART (<http://smart.embl-heidelberg.de>). (B) Neighbor-joining tree of OsVHA-E1 and its homologs. The tree was constructed using MEGA and bootstrapped with 1,000 replicates.

|                                                   |                       |     |                   |                     |                     |     |            |             |     |   |   |   |   |   |   |   |   |   |   |   |   |   |   |   |   |   |   |   |     |     |   |     |     |     |     |     |     |     |   |   |   |   |   |     |     |     |
|---------------------------------------------------|-----------------------|-----|-------------------|---------------------|---------------------|-----|------------|-------------|-----|---|---|---|---|---|---|---|---|---|---|---|---|---|---|---|---|---|---|---|-----|-----|---|-----|-----|-----|-----|-----|-----|-----|---|---|---|---|---|-----|-----|-----|
| OsVHA-E1 ( <i>Oryza_sativa</i> )                  | MNDADVAKQIQQMVRFIHQEA | EKA | SEISVSAAEEFNIEKLQ | LVEA                | E                   | KKK | 50         |             |     |   |   |   |   |   |   |   |   |   |   |   |   |   |   |   |   |   |   |   |     |     |   |     |     |     |     |     |     |     |   |   |   |   |   |     |     |     |
| AtVHA-E1 ( <i>Arabidopsis_thaliana</i> )          | MNDGDSRQIQQMVRFIHQEA  | EKA | NEISVSAAEEFNIEKLQ | LVEA                | E                   | KKK | 50         |             |     |   |   |   |   |   |   |   |   |   |   |   |   |   |   |   |   |   |   |   |     |     |   |     |     |     |     |     |     |     |   |   |   |   |   |     |     |     |
| NP_001307621.1 ( <i>Zea_mays</i> )                | MNDADVAKQIQQMVRFIHQEA | EKA | NEISVSAAEEFNIEKLQ | LVEA                | E                   | KKK | 50         |             |     |   |   |   |   |   |   |   |   |   |   |   |   |   |   |   |   |   |   |   |     |     |   |     |     |     |     |     |     |     |   |   |   |   |   |     |     |     |
| XP_003569489.1 ( <i>Brachypodium_distachyon</i> ) | MNDADVSKQIQQMVRFIHQEA | EKA | GEISVSAAEEFNIEKLQ | LVEA                | E                   | KKK | 50         |             |     |   |   |   |   |   |   |   |   |   |   |   |   |   |   |   |   |   |   |   |     |     |   |     |     |     |     |     |     |     |   |   |   |   |   |     |     |     |
| ABC70183.1 ( <i>Triticum_aestivum</i> )           | MNDTDVSKQIQQMVRFIHQEA | EKA | GEISVSAAEEFNIEKLQ | LVEA                | E                   | KKK | 50         |             |     |   |   |   |   |   |   |   |   |   |   |   |   |   |   |   |   |   |   |   |     |     |   |     |     |     |     |     |     |     |   |   |   |   |   |     |     |     |
| NP_001341701.1 ( <i>Glycine_max</i> )             | MNDADVSKQIQQMVRFIHQEA | EKA | NEISVSAAEEFNIEKLQ | LVEA                | D                   | KKK | 50         |             |     |   |   |   |   |   |   |   |   |   |   |   |   |   |   |   |   |   |   |   |     |     |   |     |     |     |     |     |     |     |   |   |   |   |   |     |     |     |
| OsVHA-E1 ( <i>Oryza_sativa</i> )                  | IRQEYERKEKQV          | EV  | RKKI              | EYSMQLNASRIKVLQAQDD | LV                  | N   | SMKEDATKQL | 100         |     |   |   |   |   |   |   |   |   |   |   |   |   |   |   |   |   |   |   |   |     |     |   |     |     |     |     |     |     |     |   |   |   |   |   |     |     |     |
| AtVHA-E1 ( <i>Arabidopsis_thaliana</i> )          | IRQDYEKKEKQAD         | V   | RKKI              | DISMQLNASRIKVLQAQDD | IV                  | N   | AMKDDAAKDL | 100         |     |   |   |   |   |   |   |   |   |   |   |   |   |   |   |   |   |   |   |   |     |     |   |     |     |     |     |     |     |     |   |   |   |   |   |     |     |     |
| NP_001307621.1 ( <i>Zea_mays</i> )                | IRQEYERKEKQV          | EV  | RKKI              | EYSMQLNASRIKVLQAQDD | LV                  | N   | KMKDDAMKEL | 100         |     |   |   |   |   |   |   |   |   |   |   |   |   |   |   |   |   |   |   |   |     |     |   |     |     |     |     |     |     |     |   |   |   |   |   |     |     |     |
| XP_003569489.1 ( <i>Brachypodium_distachyon</i> ) | IRQEYERKEKQV          | D   | V                 | RKKI                | EYSMQLNASRIKVLQAQDD | LV  | N          | KMKEDAMKEL  | 100 |   |   |   |   |   |   |   |   |   |   |   |   |   |   |   |   |   |   |   |     |     |   |     |     |     |     |     |     |     |   |   |   |   |   |     |     |     |
| ABC70183.1 ( <i>Triticum_aestivum</i> )           | IRQEYERKEKQV          | D   | V                 | RKKI                | EYSMQLNASRIKVLQAQDD | LV  | N          | KMKEDAMKEL  | 100 |   |   |   |   |   |   |   |   |   |   |   |   |   |   |   |   |   |   |   |     |     |   |     |     |     |     |     |     |     |   |   |   |   |   |     |     |     |
| NP_001341701.1 ( <i>Glycine_max</i> )             | IRQEYERKERQV          | E   | I                 | RKKI                | EYSMQLNASRIKVLQAQDD | V   | I          | SSMKEDASKEL | 100 |   |   |   |   |   |   |   |   |   |   |   |   |   |   |   |   |   |   |   |     |     |   |     |     |     |     |     |     |     |   |   |   |   |   |     |     |     |
| OsVHA-E1 ( <i>Oryza_sativa</i> )                  | LRVSHNH               | .   | HE                | YK                  | NLLK                | EL  | LV         | QG          | LL  | R | L | K | E | P | A | V | L | L | R | C | R | K | E | D | H | H | V | S | V   | L   | H | S   | 148 |     |     |     |     |     |   |   |   |   |   |     |     |     |
| AtVHA-E1 ( <i>Arabidopsis_thaliana</i> )          | LNVS                  | R   | D                 | E                   | .                   | Y   | A          | K           | Q   | L | L | K | D | L | I | V | Q | C | L | L | R | L | K | E | P | S | V | L | L   | R   | C | R   | E   | D   | L   | G   | L   | V   | E | A | V | L | D | 148 |     |     |
| NP_001307621.1 ( <i>Zea_mays</i> )                | LLV                   | S   | H                 | N                   | H                   | .   | H          | E           | Y   | K | N | L | L | K | D | L | I | V | Q | C | L | L | R | L | K | E | P | A | V   | L   | L | R   | C   | R   | K   | E   | D   | H   | H | V | S | V | L | H   | S   | 148 |
| XP_003569489.1 ( <i>Brachypodium_distachyon</i> ) | LVN                   | S   | S                 | N                   | H                   | .   | H          | E           | Y   | K | H | L | L | K | E | L | V | Q | G | L | L | R | L | K | E | P | A | V | L   | L   | R | C   | R   | K   | E   | D   | H   | H   | V | S | V | L | H | S   | 148 |     |
| ABC70183.1 ( <i>Triticum_aestivum</i> )           | LVN                   | S   | S                 | N                   | H                   | .   | H          | E           | Y   | K | N | L | L | K | E | L | V | Q | G | L | L | R | L | K | E | P | A | V | L   | L   | R | C   | R   | K   | E   | D   | H   | H   | V | S | V | L | H | S   | 148 |     |
| NP_001341701.1 ( <i>Glycine_max</i> )             | LV                    | S   | H                 | H                   | D                   | D   | H          | V           | R   | N | L | L | K | D | L | I | V | Q | C | L | L | R | L | K | E | P | S | V | L   | L   | R | C   | R   | K   | D   | L   | H   | V   | E | N | V | L | D | S   | 150 |     |
| OsVHA-E1 ( <i>Oryza_sativa</i> )                  | AKNEYASKAEV           | H   | P                 | E                   | L                   | V   | D          | H           | V   | L | P | P | S | S | H | D | S | H | E | R | F | C | S | G | G | V | L | A | S   | R   | D | G   | K   | 198 |     |     |     |     |   |   |   |   |   |     |     |     |
| AtVHA-E1 ( <i>Arabidopsis_thaliana</i> )          | AKHEYAGKAKV           | H   | A                 | P                   | E                   | V   | A          | V           | D   | T | K | I | F | L | P | P | P | K | S | N | D | P | H | G | L | C | S | G | G   | V   | L | A   | S   | R   | D   | G   | K   | 198 |   |   |   |   |   |     |     |     |
| NP_001307621.1 ( <i>Zea_mays</i> )                | AKHEYASKADV           | H   | E                 | P                   | E                   | I   | F          | V           | D   | H | V | L | P | P | A | S | H | D | A | H | G | Q | F | C | S | G | G | V | L   | A   | S | R   | D   | G   | K   | 198 |     |     |   |   |   |   |   |     |     |     |
| XP_003569489.1 ( <i>Brachypodium_distachyon</i> ) | AKNEYAAKANV           | H   | E                 | P                   | E                   | L   | V          | D           | H   | S | V | L | P | P | S | S | R | Q | D | T | H | G | Q | F | C | H | G | G | V   | L   | A | S   | R   | D   | G   | K   | 198 |     |   |   |   |   |   |     |     |     |
| ABC70183.1 ( <i>Triticum_aestivum</i> )           | AKNEYASKADV           | H   | E                 | P                   | E                   | L   | V          | D           | H   | S | V | L | P | P | S | S | H | G | D | E | H | G | Q | F | C | H | G | G | V   | L   | A | S   | R   | D   | G   | K   | 198 |     |   |   |   |   |   |     |     |     |
| NP_001341701.1 ( <i>Glycine_max</i> )             | AAQEYAEKANV           | D   | P                 | P                   | E                   | I   | V          | D           | N   | Q | V | L | P | P | S | R | H | S | H | D | L | Y | C | S | G | G | V | L | A   | S   | R | D   | G   | K   | 200 |     |     |     |   |   |   |   |   |     |     |     |
| OsVHA-E1 ( <i>Oryza_sativa</i> )                  | I                     | V   | G                 | E                   | N                   | T   | L          | D           | A   | R | L | E | V | V | F | R | K | L | P | E | I | R | K | L | F | G | Q | V | T   | 229 |   |     |     |     |     |     |     |     |   |   |   |   |   |     |     |     |
| AtVHA-E1 ( <i>Arabidopsis_thaliana</i> )          | I                     | V   | G                 | E                   | N                   | T   | L          | D           | A   | R | L | E | V | V | F | R | M | K | L | P | V | I | R | K | S | L | F | G | Q   | V   | T | 229 |     |     |     |     |     |     |   |   |   |   |   |     |     |     |
| NP_001307621.1 ( <i>Zea_mays</i> )                | I                     | V   | F                 | E                   | S                   | T   | L          | D           | A   | R | L | E | V | V | F | R | K | L | P | E | I | R | K | L | F | G | Q | T | A   | 229 |   |     |     |     |     |     |     |     |   |   |   |   |   |     |     |     |
| XP_003569489.1 ( <i>Brachypodium_distachyon</i> ) | I                     | V   | F                 | E                   | N                   | T   | V          | D           | A   | R | L | E | V | V | F | R | K | L | P | E | I | R | K | L | V | A | . | . | 227 |     |   |     |     |     |     |     |     |     |   |   |   |   |   |     |     |     |
| ABC70183.1 ( <i>Triticum_aestivum</i> )           | I                     | V   | F                 | E                   | N                   | T   | V          | D           | A   | R | L | E | V | V | F | R | K | L | P | E | I | R | K | L | V | A | . | . | 227 |     |   |     |     |     |     |     |     |     |   |   |   |   |   |     |     |     |
| NP_001341701.1 ( <i>Glycine_max</i> )             | I                     | V   | G                 | E                   | N                   | T   | L          | D           | A   | R | L | E | V | V | F | R | K | L | P | E | I | R | K | L | F | G | Q | I | V   | 231 |   |     |     |     |     |     |     |     |   |   |   |   |   |     |     |     |

**Supplemental Figure S14.** Amino acid sequence alignment of OsVHA-E1 and its homologs. Different colors indicate percentage sequence similarity (Deep blue, 100%; Pink, 75% to 100%; Light blue, 50% to 75%). GenBank protein accession numbers: *Oryza\_sativa*, XP\_015621799; *Arabidopsis\_thaliana*, NP\_192853; *Zea\_mays*, NP\_001307621; *Brachypodium\_distachyon*, XP\_003569489; *Triticum\_aestivum*, ABC70183; *Glycine\_max*, NP\_001341701.

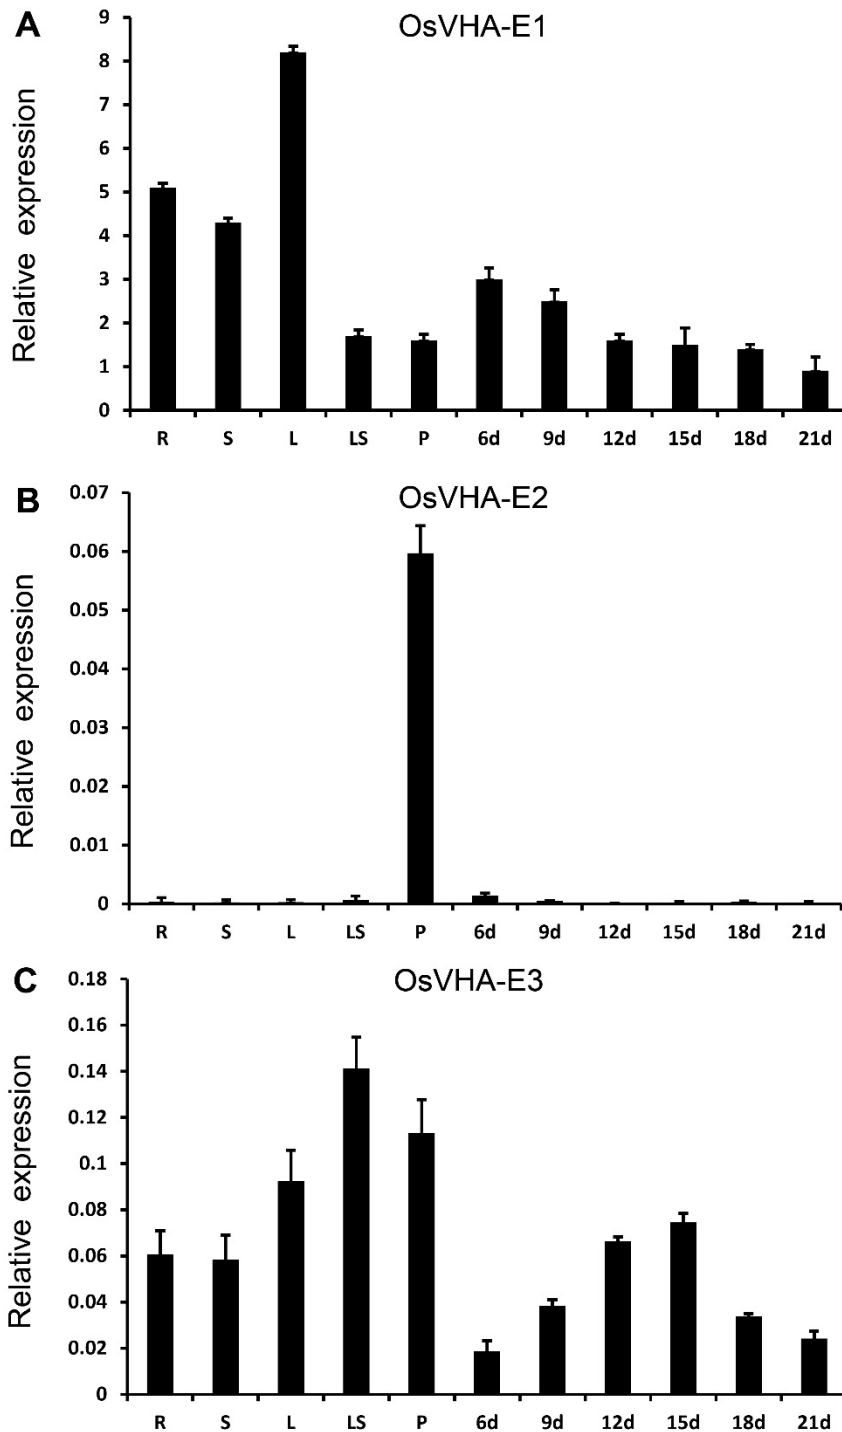

**Supplemental Figure S15.** Spatial expression patterns of *OsVHA-E*.

(A) to (C) *OsVHA-E1* (A) and *OsVHA-E3* (C) are expressed in various tissues and in developing endosperm at 6, 9, 12, 15, 18, 21 DAF. *OsVHA-E2* (B) is mainly expressed in panicles. R, roots; S, stems; L, leaves; LS, leaf sheaths; P, panicles. *Actin1* was used as an internal control. For each RNA sample, three technical replicates were performed. Values are means  $\pm$  SD.

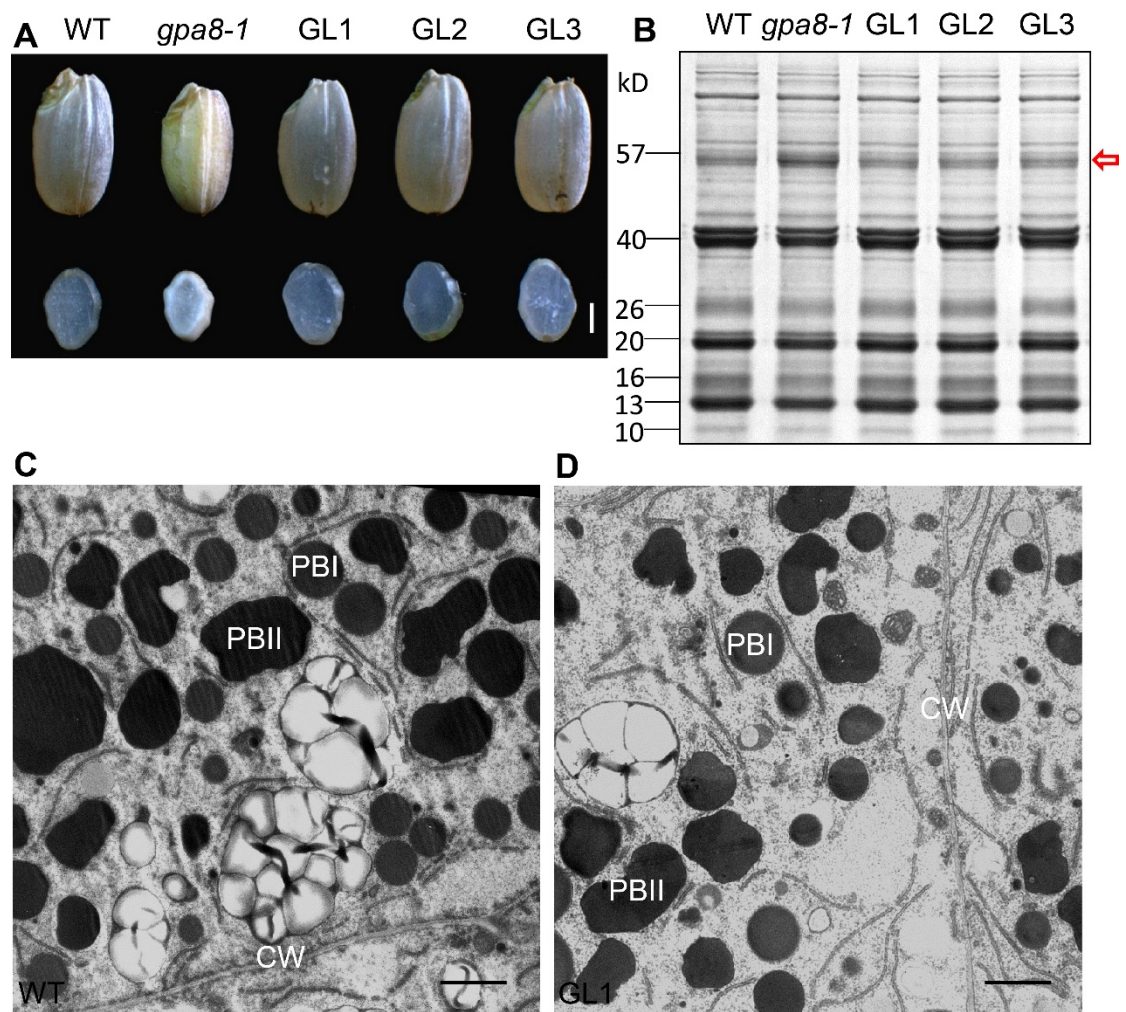

**Supplemental Figure S16.** Complementation of *gpa8-1* mutant phenotypes by *p35S::OsVHA-E1-GFP*.

(A-D) *p35S::OsVHA-E1-GFP* transgene rescues the grain appearance (A), storage protein composition pattern (B), and the storage protein trafficking defects (C and D) of the *gpa8-1* mutant. . GL1 to GL3 are three independent T<sub>1</sub> transgenic lines. Bars = 1 mm in (A). Bars = 2  $\mu$ m in (C) and (D).



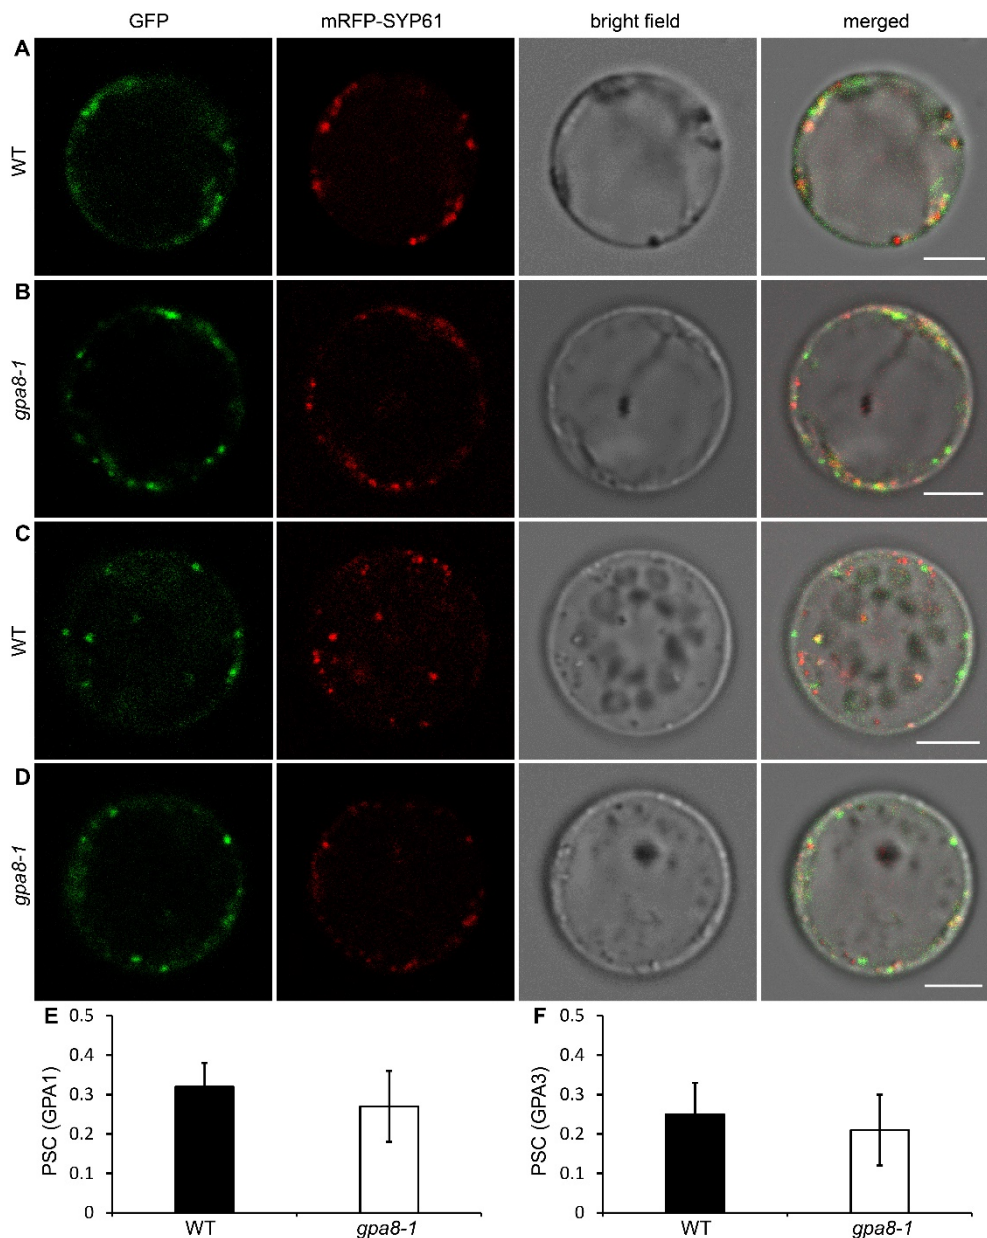

**Supplemental Figure S17.** Intracellular acidification increased degree of colocalization of GPA1 and GPA3 with mRFP-SYP61 in *gpa8-1*.

(A) and (B) Localization of GFP-GPA1 in WT (A) and *gpa8-1* (B) protoplasts.

(C) and (D) Localization of GPA3-GFP in WT (C) and *gpa8-1* (D) protoplasts.

*gpa8-1* protoplasts were incubated for 5 min in acidic equilibration buffer, pH 6.2. pH was equilibrated with 10  $\mu$ M nigericin, 60 mM KCl, and 10 mM MES/HEPES Bis-Tris-propane. mRFP-SYP61 serves as TGN marker. Bars = 5  $\mu$ m in (A-D). (E) and (F) Pearson's correlation coefficient (PSC) of GPA1 (E) and GPA3 (F) with mRFP-SYP61. Values are means  $\pm$  SD. \* $P$  < 0.05 ( $n$  = 37 protoplasts, Student's  $t$  test).

**Supplemental Table S1** Properties of wild type and *gpa8-1* in maturation stage.

|                        | WT           | <i>gpa8-1</i>  |
|------------------------|--------------|----------------|
| Plant height (cm)      | 97.5 ± 2.3   | 51.2 ± 1.5**   |
| Tiller number          | 10.3 ± 1.7   | 5.2 ± 1.1**    |
| 1,000-grain weight (g) | 27.6 ± 0.8   | 19.8 ± 0.6**   |
| Protein content (%)    | 8.11 ± 0.04  | 8.24 ± 0.07    |
| Amylose content (%)    | 17.42 ± 0.37 | 13.52 ± 0.28** |

Values are means ± SD. \*\* $P < 0.01$  (Student's *t* test).

**Supplemental Table S2** Segregation of mutant phenotypes in reciprocal crosses between wild type and the *gpa8-1* mutant.

| Cross                                   | Normal | 57H/Floury | $X^2_{3:1}$ |
|-----------------------------------------|--------|------------|-------------|
| <i>gpa8-1</i> /wild type F <sub>2</sub> | 171    | 62         | 0.24        |
| wild type/ <i>gpa8-1</i> F <sub>2</sub> | 167    | 60         | 0.18        |

**Supplemental Table S4** Primers used for mapping.

| Primer name | Forward sequence         | Reverse sequence           |
|-------------|--------------------------|----------------------------|
| D28         | ATGGAAGTGCAGATTTGATGGA   | ACTTCATATTCCACTGGGCGTC     |
| D31         | CCCTTATCCTTATCCCCTCCCA   | ACAACCTGCCCGTGCATCGCCGCCTC |
| D13         | AGCCTGGATAAGATGGTTCGTC   | GCTGTAGTTGCTGTTTGCCTGT     |
| D12         | TAGCCTCATGGCTCGGTCACTC   | GTGCTGCCTAACTTGGCGGAAT     |
| D38         | ATGTCAGTAAGCCACATCAGCACC | GTGCCACCTCCTGTGCAAGAGC     |
| Indel1-11   | GGATGATTTTGAGGAACATGG    | ATCTTTGCCTGCAGAGTGCT       |

**Supplemental Table S5** Primers used for RT-qPCR analysis.

| Primer name | Forward sequence          | Reverse sequence          |
|-------------|---------------------------|---------------------------|
| GluA1       | TGATGGTGAAGTGCCAGTTGTTGC  | ACGCCTGTATGCTTGAGGGTTTCT  |
| GluB2       | TGTCCTTCGCCCTGGACAACTATT  | TGGTAAGGCGCGGAATACTGAGTT  |
| GluC1       | ATGTAAAGTTCAACCGCGGCGATG  | TCTCGTTGATCTGCCACTCAGCAT  |
| GluD1       | AAATGAGCAGTTTTCGATGCGCTGG | TGTTTCGAGTATCGAGGCACCACAA |
| Pro10.1     | GTTGCATGCAGCTACAAGGCATGA  | TCTGCATCGCCATCTTCACCATCT  |
| Pro13a.2    | TTCAGGCGATTGTGCAGCAACTAC  | GGATGGCAAGTTTAAGGCCAGCAA  |
| Pro13b.2    | GTATAGCATTGCGGCAAGCACCTT  | ATGGCCTGGACAACGTTAATGTCC  |
| Pro16.2     | GCTCTCAATTTGCCCTCCATGTGT  | TGGTACACACTACCAAGAACCGCA  |
| Globulin    | GATCAGTTCATCACCAACAAAACA  | TCCAGAACGCACAAAATCAT      |
| OsVHA-E1    | AAAGCAACTCCTGCGTGTCAGC    | TTTCAACCGAAGCAAACCCTGAAC  |
| Actin1      | TGGTCGTACCACAGGTATTG      | CCACATCTGCTGGAATGTGCTG    |

**Supplemental Table S6** Primers used for vector construction.

| Use                         | Primer name             | Sequence                                         |
|-----------------------------|-------------------------|--------------------------------------------------|
| Ubi-                        | 1390-OsVHA-E1-F         | CCGGCGCGCCAAGCTTATGAACGACGCCGATGTCTG             |
| OsVHA-E1                    | 1390-OsVHA-E1-R         | GAATTCCCAGGGATCCTTATGCCGTCACCTGACCAA             |
| Subcellular<br>localization | 1305-OsVHA-E1-GFP-<br>F | CGGAGCTAGCTCTAGAATGAACGACGCCGATGTCTG             |
|                             | 1305-OsVHA-E1-GFP-<br>R | TGCTCACCATGGATCCTGCCGTCACCTGACCAAAA              |
| CRISPR                      | CRISPR- OsVHA-E1-F      | AGATGATCCGTGGCAAAGAAGACCATCATCATGGTTTTAGAGCTATGC |
|                             | CRISPR-OsVHA-E1-R       | GCATAGCTCTAAAACCATGATGATGGTCTTCTTTGCCACGGATCATCT |
